# Supplementary material
Source: PubMed Central journal article supplement (PMC6191882)
Supplement: pps-0087-0204-s01.pdf [file pps-0087-0204-s01.pdf]

**Table S1** Results of the survey\*

| Item       | Item full                                                                                                                                                                     | N  | Mean       | SD  | Min | Max |
|------------|-------------------------------------------------------------------------------------------------------------------------------------------------------------------------------|----|------------|-----|-----|-----|
| <b>A01</b> | Making use of placebo effects to optimize treatments will ultimately lead to better treatment outcomes.                                                                       | 29 | <b>8.7</b> | 1.4 | 6   | 10  |
| <b>A02</b> | Making use of placebo effects to optimize treatments will ultimately lead to lower treatment side effects.                                                                    | 27 | <b>7.1</b> | 2.4 | 0   | 10  |
| <b>A03</b> | Making use of placebo effects to optimize treatments will ultimately lead to lower costs.                                                                                     | 24 | <b>6.8</b> | 2.4 | 0   | 10  |
| <b>A04</b> | Open-label placebos should be officially registered as regular treatments (e.g., FDA approved) if positive evidence and positive replications continue to accumulate.         | 27 | <b>5.8</b> | 3.0 | 0   | 10  |
| <b>A05</b> | If a treatment shows equal efficacy to a placebo, both should be offered to the patient.                                                                                      | 22 | <b>6.0</b> | 3.3 | 0   | 10  |
| <b>A06</b> | If a treatment shows equal efficacy to a placebo, the treatment should not be offered to the patient, since, by definition, it is more invasive and expensive than a placebo. | 21 | <b>4.1</b> | 2.9 | 0   | 10  |
| <b>A07</b> | Given that more invasive treatments have sometimes been found to have larger placebo effects, more invasive treatments should be preferred.                                   | 20 | <b>1.7</b> | 1.9 | 0   | 7   |
| <b>A08</b> | Patients should be informed about the role of placebo effects in treatment outcomes.                                                                                          | 23 | <b>8.7</b> | 1.8 | 3   | 10  |
| <b>A09</b> | It is unethical for doctors not to make use of placebo effects.                                                                                                               | 24 | <b>6.9</b> | 2.8 | 0   | 10  |
| <b>A10</b> | Treatments should never be hidden, but always be given in an open and transparent manner to make optimal use of placebo effects.]                                             | 24 | <b>7.3</b> | 2.5 | 2   | 10  |
| <b>B01</b> | Whenever the evidence base suggests placebos are therapeutically useful, doctors should regularly prescribe open-label placebos in view of their beneficial health effects.   | 15 | <b>5.7</b> | 3.2 | 0   | 10  |
| <b>B02</b> | Deception is a necessary characteristic of placebo effects. Consequently patients should not be informed when doctors prescribe placebos.                                     | 28 | <b>1.8</b> | 2.0 | 0   | 8   |
| <b>B03</b> | Open-label prescription of placebos is preferable to hidden prescription of placebos.                                                                                         | 23 | <b>8.7</b> | 1.6 | 4   | 10  |
| <b>B04</b> | It should be possible to authorize concealment of placebo administration.                                                                                                     | 22 | <b>6.6</b> | 3.4 | 0   | 10  |
| <b>B05</b> | Deceptive placebos should never be used in a clinical setting.                                                                                                                | 25 | <b>6.2</b> | 3.2 | 0   | 10  |
| <b>B06</b> | When deception plays a role in eliciting and/or magnifying placebo effects, it is unethical for doctors to deceive patients even for therapeutic reasons.                     | 23 | <b>6.7</b> | 2.6 | 2   | 10  |
| <b>B07</b> | Deceptive placebos should only be administered when there are no other effective treatment options.                                                                           | 21 | <b>3.9</b> | 3.0 | 0   | 8   |
| <b>B08</b> | Open-label placebos should be the treatment of first choice in all nonlethal conditions where they have shown efficacy.                                                       | 23 | <b>3.4</b> | 2.7 | 0   | 10  |
| <b>B09</b> | Insurance companies and pharmacists should encourage the prescription of open-label placebos.                                                                                 | 19 | <b>4.4</b> | 2.8 | 0   | 9   |
| <b>B10</b> | A government that does not encourage the large-scale use of placebo effects is wasting taxpayers' money.                                                                      | 18 | <b>4.0</b> | 3.2 | 0   | 10  |

Implications of placebo and nocebo effects - Supplementary Appendix

|            |                                                                                                                                                                                                                        |    |            |     |   |    |
|------------|------------------------------------------------------------------------------------------------------------------------------------------------------------------------------------------------------------------------|----|------------|-----|---|----|
| <b>C01</b> | Nocebo effects should be explained to patients.                                                                                                                                                                        | 24 | <b>8.4</b> | 1.9 | 2 | 10 |
| <b>C02</b> | In view of possible nocebo effects, doctors should avoid emphasizing possible treatment side effects or risks of a specific treatment.                                                                                 | 24 | <b>5.9</b> | 2.5 | 0 | 10 |
| <b>C03</b> | It is unethical not to inform patients about possible nocebo effects.                                                                                                                                                  | 22 | <b>6.6</b> | 2.4 | 2 | 10 |
| <b>C04</b> | Whenever a treatment is prescribed, information about possible side effects should be presented to patients in such a way as to minimize nocebo effects                                                                | 25 | <b>8.8</b> | 1.3 | 6 | 10 |
| <b>C05</b> | Patients should be informed about the possible occurrence of nocebo effects and given the choice between complete or limited information about all possible risks and treatment side effects (authorized concealment). | 25 | <b>7.8</b> | 1.9 | 2 | 10 |
| <b>C06</b> | It is important to identify patients with fear of treatment side effects as these patients are particularly vulnerable to nocebo effects.                                                                              | 22 | <b>7.1</b> | 2.9 | 0 | 10 |
| <b>C07</b> | Patients with a high fear of side effects should be offered additional treatment to reduce their fear (e.g., psychological treatment) to prevent nocebo effects.                                                       | 22 | <b>7.1</b> | 1.9 | 2 | 10 |
| <b>C08</b> | Clinicians should be trained in the specific skills involved in minimizing nocebo effects.                                                                                                                             | 28 | <b>8,6</b> | 1.5 | 3 | 10 |
| <b>C09</b> | Clinicians should receive regular education and training about nocebo effects, e.g., how to communicate about the risks and side effects of treatments.                                                                | 26 | <b>8.7</b> | 1.1 | 7 | 10 |
| <b>C10</b> | Patients should be screened for possible fear of side effects as a risk factor for the development of nocebo effects.                                                                                                  | 20 | <b>6.7</b> | 3,0 | 0 | 10 |
| <b>D01</b> | Informing patients about the possible effects of their own expectations should be part of every consultation with doctors.                                                                                             | 23 | <b>6.2</b> | 3.0 | 0 | 10 |
| <b>D02</b> | A good patient-clinician relationship – characterized by trust, warmth, and empathy – is essential to make optimal use of placebo effects for the therapeutic efficacy of a treatment.                                 | 27 | <b>8.3</b> | 1.9 | 2 | 10 |
| <b>D03</b> | A good patient-clinician relationship - characterized by trust, warmth, and empathy - helps to prevent unwanted treatment side effects.                                                                                | 21 | <b>7.9</b> | 1.9 | 3 | 10 |
| <b>D04</b> | Patients should be informed about the health benefits of factors such as trust, warmth, and empathy in patient-clinician relationships to make optimal use of placebo effects.                                         | 27 | <b>6.1</b> | 2.6 | 0 | 10 |
| <b>D05</b> | Deceptive placebos harm doctor-clinician relationships.                                                                                                                                                                | 22 | <b>7.1</b> | 2.2 | 2 | 10 |
| <b>D06</b> | Clinicians should receive regular education and training about how to make optimal use of placebo effects in their treatments.                                                                                         | 27 | <b>8.5</b> | 1.4 | 6 | 10 |
| <b>D07</b> | Clinicians should be trained in the specific skills involved in optimizing placebo effects.                                                                                                                            | 28 | <b>8.6</b> | 1.4 | 5 | 10 |
| <b>D08</b> | Clinicians need to receive medical ethics education to harness placebo effects ethically in clinical practice.                                                                                                         | 26 | <b>8.5</b> | 1.4 | 6 | 10 |
| <b>D09</b> | To optimize placebo effects, it is recommended that clinicians provide clear mechanistic descriptions of how treatments work.                                                                                          | 22 | <b>7.2</b> | 2.2 | 0 | 10 |
| <b>D10</b> | To optimize placebo effects, it is recommended that clinicians emphasize the possible treatment benefits, even if they include unrealistic outcomes.                                                                   | 22 | <b>2.7</b> | 2.2 | 0 | 8  |

\*Survey items of the different themes A-D. Number of participants (N) who responded to the item. Mean and standard deviation (SD) of all items with minimum (Min) and maximum (Max) scores of all respondents.
